# Supplementary material
Source: PubMed Central journal article supplement (PMC3500584)
Supplement: NIHMS415203-supplement-01.pdf [file NIHMS415203-supplement-01.pdf]

## **Supplementary Figure Legends**

### **Supplementary Figure 1. TLR11 is expressed in small intestinal epithelium and limits *S. typhimurium* dissemination.**

**A**, TLR11 expression by Q-PCR from cDNA prepared from the indicated tissues. All data is normalized to beta-actin and set as fold expression compared with expression in heart. **B**, In situ hybridization for TLR11 was performed using a specific probe for TLR11. As a control for the specificity of staining, small intestinal sections from TLR11 KO mice were probed under identical conditions. **C**, Bacterial dissemination examined by Colony Forming Units (CFU) 5 days post oral inoculation of *S. typhimurium* ( $10^8$  CFU per animal) in wild type C57/BL6 and *tlr11*<sup>-/-</sup> mice. Homogenized tissue from mediastinal lymphnodes (MLN); liver; spleen, and kidney, were plated on LB plates containing streptomycin. After 16 hours of growth at 37<sup>0</sup>C, bacterial colonies were counted and plotted as a CFU per gram tissue.

### **Supplementary Figure 2. TLR11 recognizes flagellin from both uropathogenic *E. coli* 8NU and *S. Typhimurium*.**

**A**, NF- $\kappa$ B luciferase activity in specific fractions after treatment with DNase, RNase, or Proteinase-K. Induction of NF- $\kappa$ B was measured using fractions 8 and 14 obtained from a linear NaCl gradient performed on a Mono-Q anion exchange column. Fractions 8 and 14 were dialyzed and subjected to treatment with DNase, RNase, Proteinase-K, or were passed over a polymyxin-B column and then used to stimulate peritoneal macrophages

obtained from wild type and *tlr11*<sup>-/-</sup> mice and analyzed for IL6 from culture supernatants or following 24 hours of stimulation. **B**, Mascot search analysis result obtained using the highly purified fraction 14, excised following SDS-PAGE, cut and subjected to LC-MS/MS to identify TLR11-ligand peptides. **C**, 8NU lysates were fractionated on a Mono-Q anion exchange column using a linear NaCl gradient (50-500mM NaCl). Fractions were used to stimulate RAW-NF- $\kappa$ B luciferase cells. **D, 8NU Fraction 7 from** either untreated or after treatment with DNase, RNase, or Proteinase-K, were used to stimulate RAW-NF- $\kappa$ B luciferase cells. **E**, Fractions from (C) were subjected to SDS-PAGE and an approximately 60kDa protein band visualized by Coomassie blue staining, and co-eluting with the stimulatory activity, was subjected to Mass spectrometry analysis. The predominant peptide species corresponded to *E coli* flagellin.

**Supplementary Figure 3. Role of TLR11 and TLR5 in the response to *S. typhimurium*.**

**A. TLR11 can form homodimers and heterodimerize with TLR5.** HEK293 cells were transfected with plasmids encoding TLR11-Flag, TLR11-HA or TLR5-V5 as indicated. Cells were lysed and subjected to SDS-PAGE followed by Western blotting as indicated (upper panel) or immunoprecipitation with anti-flag M2 beads followed by SDS-PAGE and Western blotting as indicated (lower panel). **B, C. TLR11 expression is increased in response to *S. typhimurium* flagellin and this response is augmented in TLR5 KO mice.** **B**, Wild type macrophages were infected with *S. typhimurium* or were stimulated with *S. typhimurium* FliC (100ng/ml) *in vitro* for 6 hours, total RNA was extracted, cDNA was prepared and TLR11 expression was determined by Q PCR. **C**, Wild type and TLR5 KO

mice were orally infected with *S. typhimurium* and lamina propria Macrophages (LPMf) were isolated by FACS sorting, and TLR11 expression was examined by QPCR. **D. Loss of enhanced resistance of TLR5 deficient mice upon TLR11 deletion.** Wild type (WT) and *tlr11*<sup>-/-</sup>, *tlr5*<sup>-/-</sup>, *tlr11*<sup>-/-</sup> /*tlr5*<sup>-/-</sup> mice were challenged with *S. typhimurium* and were sacrificed on day 5 post-infection. CFU determined as in Supplementary Figure 1C.

**Supplementary Figure 4. Characterization of the *tlr11*<sup>-/-</sup> *S. typhi* infection model.**

**A,** The *S. typhi* virulence gene for Vi+ antigen was analyzed by PCR, to confirm the strain used in our study is a Vi Antigen positive strain. **Development of fever during low dose *S. typhi* infection.** **B,** body temperature was examined daily following *S. typhi* infection orally at low dose (10<sup>6</sup> CFU per mouse) in wild type and *tlr11*<sup>-/-</sup> mice. **Development of hypothermia and gastrointestinal bleeding during lethal high dose infection:** **C,** temperature was monitored in wild type and *tlr11*<sup>-/-</sup> mice infected orally with high dose (5x10<sup>8</sup> CFU per animal) *S. typhi*. **D,** A stool blood clinical score was calculated at day 10 of high dose *S. typhi* infection based on the following scoring system: Hemocult negative, formed pellets (0); Hemocult positive, formed pellets (1); Gross Blood, formed pellets (2); Gross Blood, loose stool (Bloody Diarrhea; 3).

**Supplementary Figure 5. *S. typhi* dissemination and end organ histology in the *tlr11*<sup>-/-</sup> mouse model.**

**Intestinal histology following *S. typhi* infection of *tlr11*<sup>-/-</sup> mice.** **A,** tissue destruction in the ileum after *S. typhi* infection was determined by H & E staining of sections of WT

and *tlr11*<sup>-/-</sup> mice at day-10 post oral infection with 5x10<sup>8</sup> CFU *S. typhi*. Perforations and loss of architecture was observed in the *tlr11*<sup>-/-</sup> mice as indicated by arrows. **B**, cecum and colon were examined as in A. Necrosis, loss of architecture, and large lymph aggregates (middle panel) was observed in the *tlr11*<sup>-/-</sup> mice. **End organ histology following *S. typhi* infection of *tlr11*<sup>-/-</sup> mice.** H & E stained sections of Spleen, **C**, and Lung and Kidney, **D**, of WT and *tlr11*<sup>-/-</sup> mice at day-10 post oral infection with 5x10<sup>8</sup> CFU *S. typhi*. Spleen demonstrated characteristic typhoid nodules, diminished red zone, and areas of necrotic cell death. ***S. typhi* disseminates to the gall bladder after oral infection of *tlr11*<sup>-/-</sup> mice.** WT and *tlr11*<sup>-/-</sup> mice at day-10 post oral infection with 5x10<sup>8</sup> CFU *S. typhi* were sacrificed. Gall bladder was collected and **E**, used for paraffin sections and H&E staining, or stained with anti-*Salmonella* FITC conjugated antibody. Representative bacteria stained by the a-*Salmonella* antibody are indicated by arrows. **F**, alternatively gall bladders was homogenized and bacterial CFU's detected by plating on LB-agar plate.

**Supplementary Figure 6. *S. typhi* infection of *tlr11*<sup>-/-</sup> macrophages *in vitro*.**

WT and *tlr11*<sup>-/-</sup> peritoneal macrophages were infected *in vitro* with live Cy5 labeled *S.typhi* (MOI=1:10). *S.typhi* infection was determined by, **A**, visualizing labeled *S.typhi* by microscopy and, **B**, by gentamycin assays. **Mice deficient for TLR11 are susceptible to low dose intraperitoneal *S. typhi* infection.** WT and *tlr11*<sup>-/-</sup> mice were infected by intraperitoneal injection of 10<sup>4</sup> CFU *S.typhi*. **C**, survival kinetics for WT and *tlr11*<sup>-/-</sup> mice

(n=5). **D**, CFU in various organs was assessed at day-2 after intraperitoneal injection of  $10^4$  CFU *S.typhi*.

**Supplementary Figures**

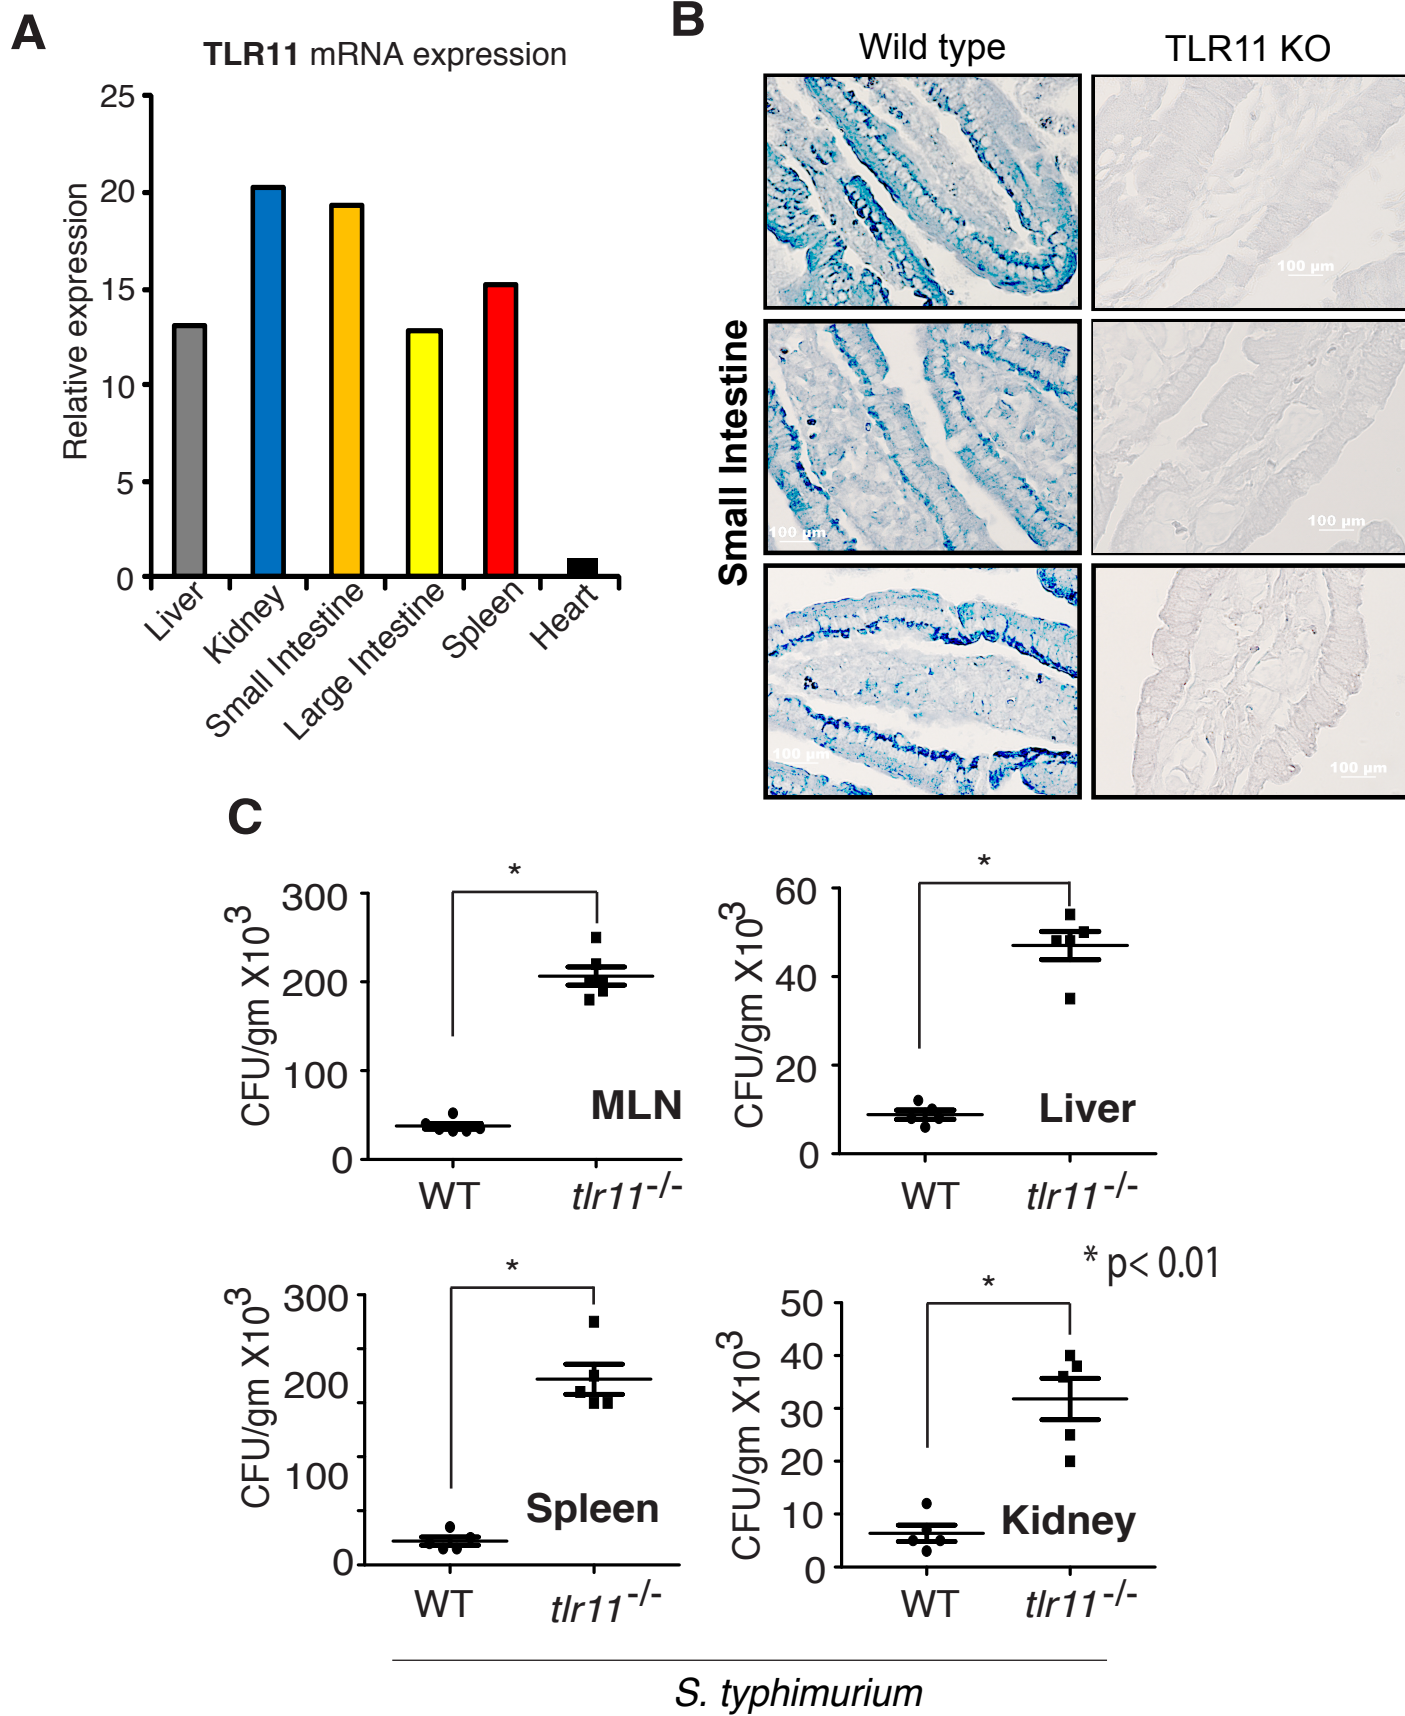

**A** Supplemental Figure 2  
*S. typhimurium* Mono-Q fractions

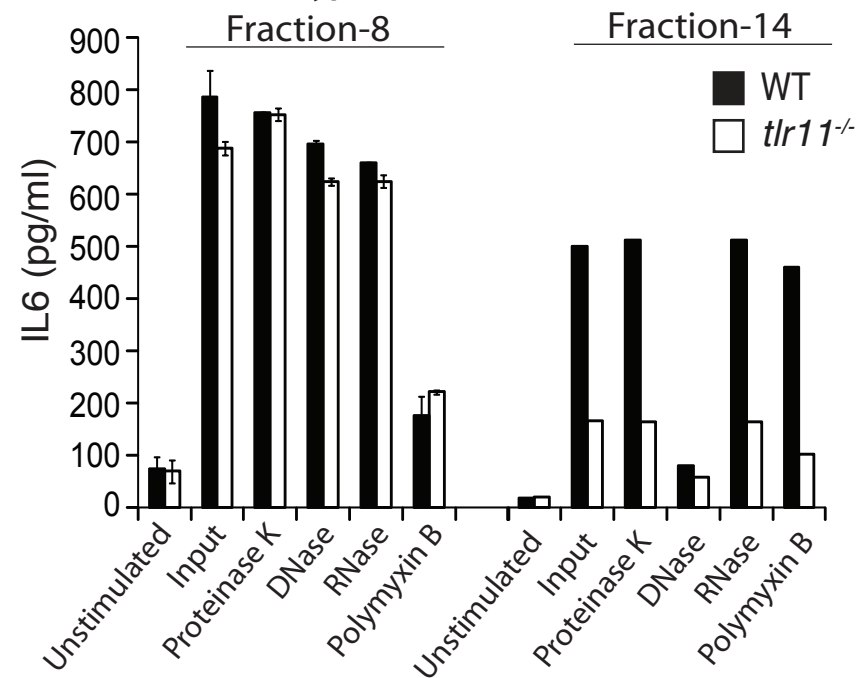

**B**

Mascot Search Results

Protein View

Match to: FLIC\_SALTY

Score: 883

Flagellin OS=Salmonella typhimurium GN=flic PE=1 SV=4

Nominal mass (M<sub>r</sub>): 51581;

Calculated pI value: 4.79

NCBI BLAST search of [FLIC\\_SALTY](#)

Taxonomy: [Salmonella enterica subsp. enterica serovar Typhimurium](#)

Fixed modifications: Carbamidomethyl (C) Variable modifications: Acetyl (Protein N-term),

Oxidation (M) Cleavage by Trypsin: cuts C-term side of KR unless next residue is P Sequence Coverage: 29%

Matched peptides shown in **Bold** :

1 MAQVINTNSL SLLTQNNLNK **SQ**SALGTAIE RLSSGLRINS **AK**DDAAGQAI 51 ANRFTANIKG LTOASRNAND GISIAQTEG  
ALNEINNLQ RVRELAVQSA 101 NSTNSQSDLD SIQAEIQRLL **NE**IDRVSGQT **QF**NGVQVLAQ DNTLTIQVGA 151 NDGETIDIL  
**KQ**INSQTLGL **DTL**NVQKQYK VSDTAATVTG YADTTIALDN 201 STFKASATGL GGTDQKIDGD LKFD DTTGKY YAKVVTGGT  
GKDGYYEVSV 251 DKTNGEVTLA GGATSPLTGG LPATATEDVK NVQVANADLT EAKAALTAAG 301 VTGTASVVMK SYTDNNGKI  
DGLAVK**VGD** DYYSATQNKD GSISINTKY 351 TADDGTSKTA LNK**LG**GADGK **TE**VVSIGGKT YAASKAEGHN FKAQPDLAEA 401  
AATTTENPLQ **KIDA**ALAQVD **TL**RSDLGAVQ **NRF**NSAITNL **GNT**VNNLTS 451 **RS**RIEDSDYA **TE**VNSMSRAQ ILQAGTSVL  
AQANQPQNV LSLLR

| Start     | End       | Observed Mr(expt) | Mr(calc)  | Delta   | Miss Sequence                                                           |
|-----------|-----------|-------------------|-----------|---------|-------------------------------------------------------------------------|
| 21 - 31   | 566.7866  | 1131.5586         | 1131.5884 | -0.0297 | 0 K.SQ <b>S</b> ALGTAIER.L (Ions score 61)                              |
| 38 - 53   | 807.8915  | 1613.7684         | 1613.8121 | -0.0437 | 1 R. <b>I</b> NSAKDDAAGQAIANR.F (Ions score 47)                         |
| 43 - 53   | 551.2425  | 1100.4704         | 1100.5210 | -0.0506 | 0 K.DDAAGQAIANR.F (Ions score 61)                                       |
| 120 - 125 | 380.1982  | 758.3818          | 758.3922  | -0.0104 | 0 R.L <b>N</b> EIDR.V (Ions score 50)                                   |
| 126 - 136 | 583.2954  | 1164.5762         | 1163.5935 | 0.9827  | 0 R.VSGQT <b>Q</b> FNGVQV.V (Ions score 74)                             |
| 162 - 178 | 633.9872  | 1898.9398         | 1899.0061 | -0.0664 | 0 K.Q <b>I</b> NSQTLGLD <b>TL</b> NVQKQ.Y (Ions score 28)               |
| 162 - 178 | 950.5069  | 1898.9992         | 1899.0061 | -0.0069 | 0 K.Q <b>I</b> NSQTLGLD <b>TL</b> NVQKQ.Y (Ions score 44)               |
| 328 - 339 | 680.7949  | 1359.5752         | 1359.5943 | -0.0190 | 0 K.V <b>G</b> DDYYSATQNK.D (Ions score 66)                             |
| 364 - 379 | 496.5987  | 1486.7743         | 1486.7991 | -0.0249 | 1 K.L <b>G</b> GADGK <b>TE</b> VVSIGGK.T (Ions score 133)               |
| 364 - 379 | 744.4009  | 1486.7872         | 1486.7991 | -0.0119 | 1 K.L <b>G</b> GADGK <b>TE</b> VVSIGGK.T (Ions score 92)                |
| 371 - 379 | 445.2386  | 888.4626          | 888.4917  | -0.0290 | 0 K. <b>T</b> EVVSIGGK.T (Ions score 70)                                |
| 412 - 423 | 643.3501  | 1284.6856         | 1284.7038 | -0.0181 | 0 K. <b>I</b> DAALAQVD <b>TL</b> RS (Ions score 68)                     |
| 424 - 432 | 480.2466  | 958.4786          | 958.4832  | -0.0046 | 0 R.S <b>D</b> LGAVQNR.F (Ions score 54)                                |
| 433 - 451 | 1004.0101 | 2006.0056         | 2006.0181 | -0.0124 | 0 R.F <b>N</b> SAITNLG <b>N</b> T <b>V</b> NNLTSAR.S (Ions score 38)    |
| 452 - 468 | 653.9334  | 1958.7784         | 1958.8640 | -0.0856 | 1 R. <b>S</b> RIEDSDYA <b>TE</b> VNSMSR.A (Ions score 35)               |
| 452 - 468 | 980.4268  | 1958.8390         | 1958.8640 | -0.0249 | 1 R. <b>S</b> RIEDSDYA <b>TE</b> VNSMSR.A (Ions score 43)               |
| 452 - 468 | 659.2704  | 1974.7894         | 1974.8589 | -0.0695 | 1 R. <b>S</b> RIEDSDYA <b>TE</b> VNSMSR.A Oxidation (M) (Ions score 37) |
| 452 - 468 | 988.4035  | 1974.7924         | 1974.8589 | -0.0664 | 1 R. <b>S</b> RIEDSDYA <b>TE</b> VNSMSR.A Oxidation (M) (Ions score 34) |
| 454 - 468 | 858.8293  | 1715.6440         | 1715.7308 | -0.0868 | 0 R. <b>I</b> EDSDYA <b>TE</b> VNSMSR.A (Ions score 78)                 |
| 454 - 468 | 866.8666  | 1731.7186         | 1731.7257 | -0.0071 | 0 R. <b>I</b> EDSDYA <b>TE</b> VNSMSR.A Oxidation (M) (Ions score 55)   |

**C**

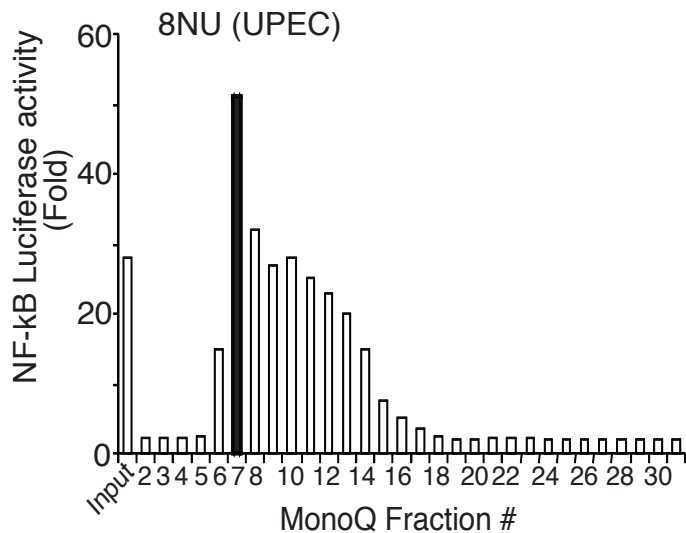

**D**

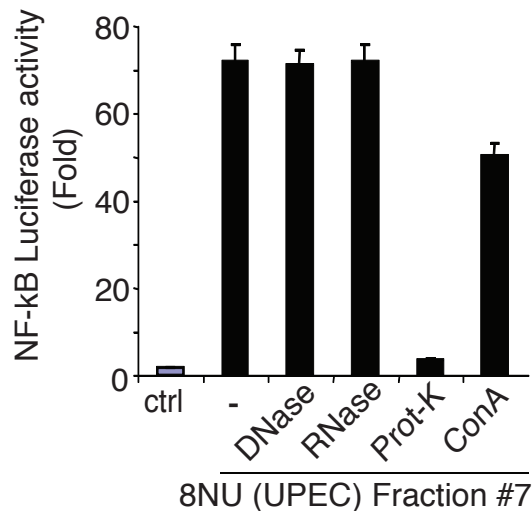

**E**

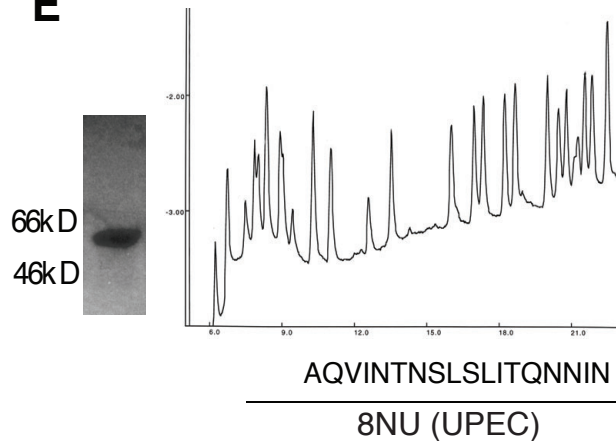

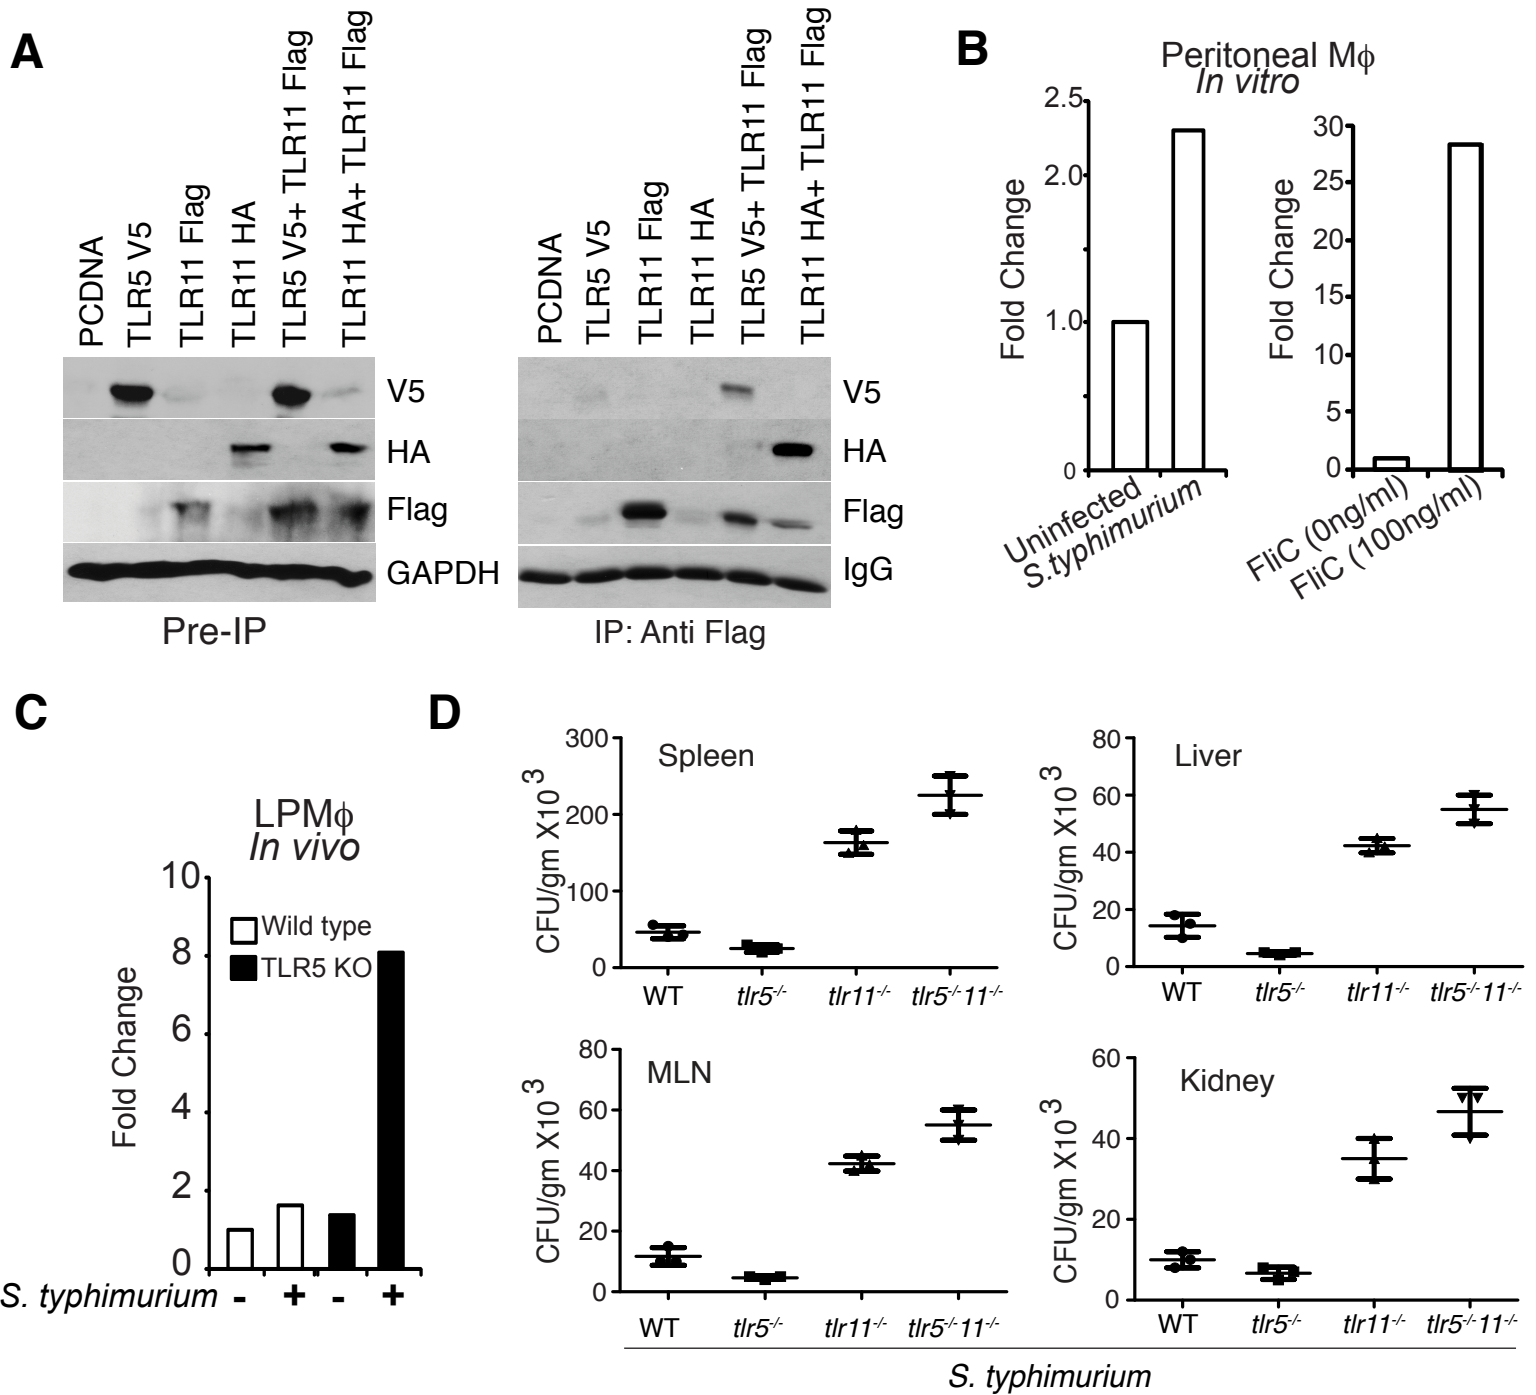





A.

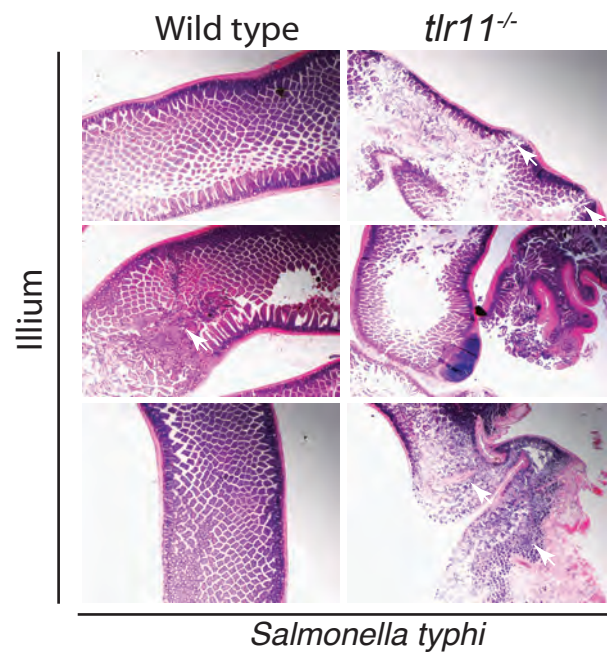

B.

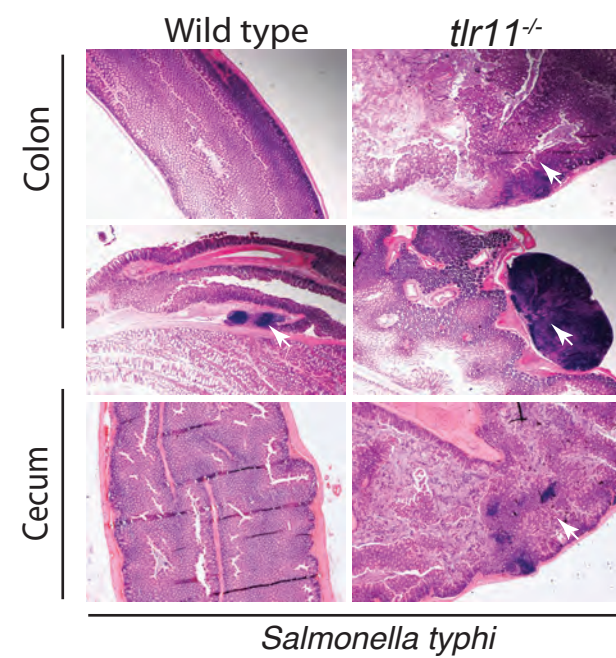

C.

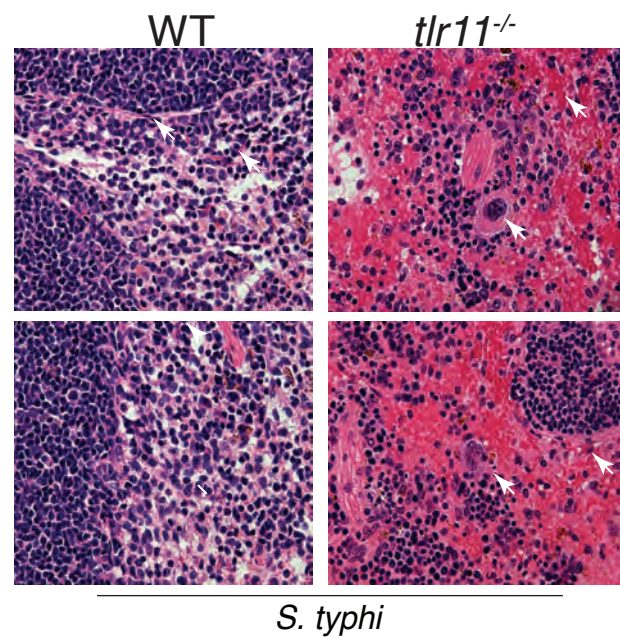

D.

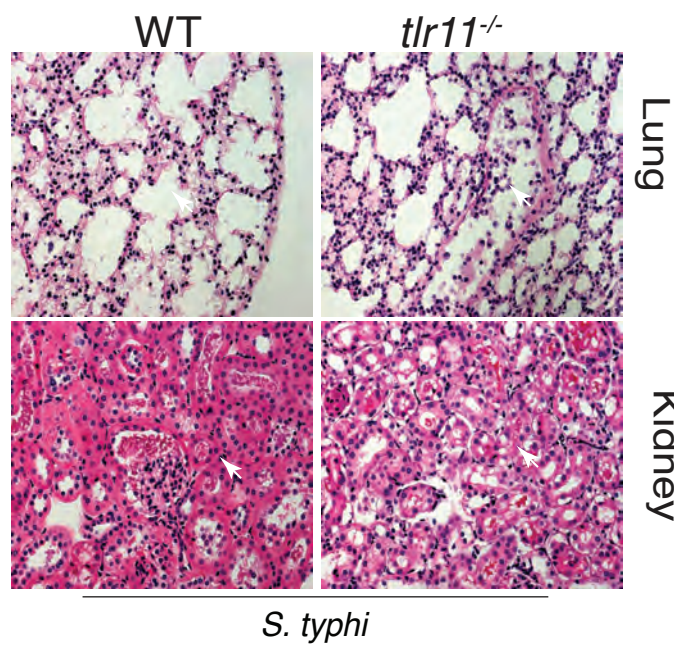

E.

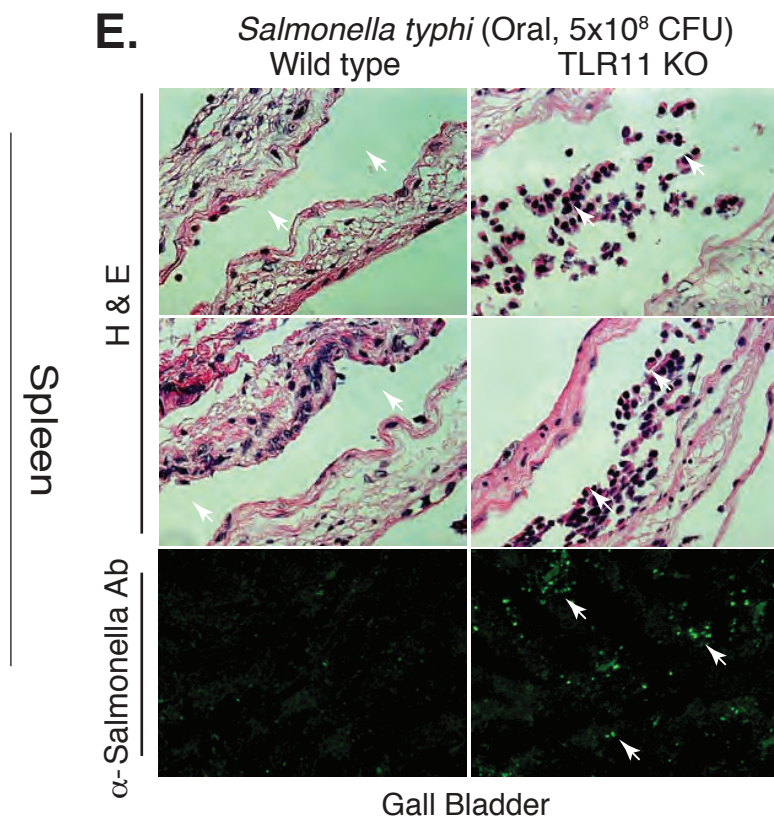

F.

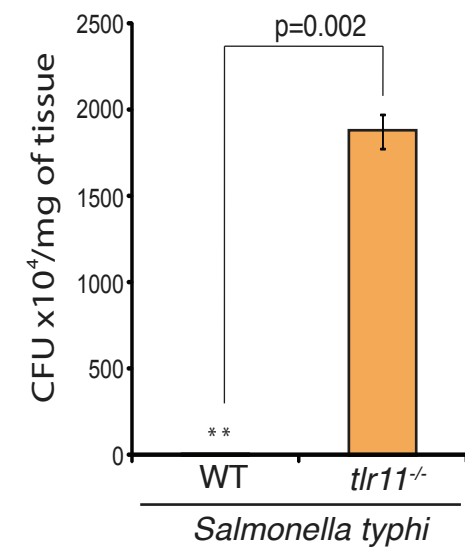

**A.**

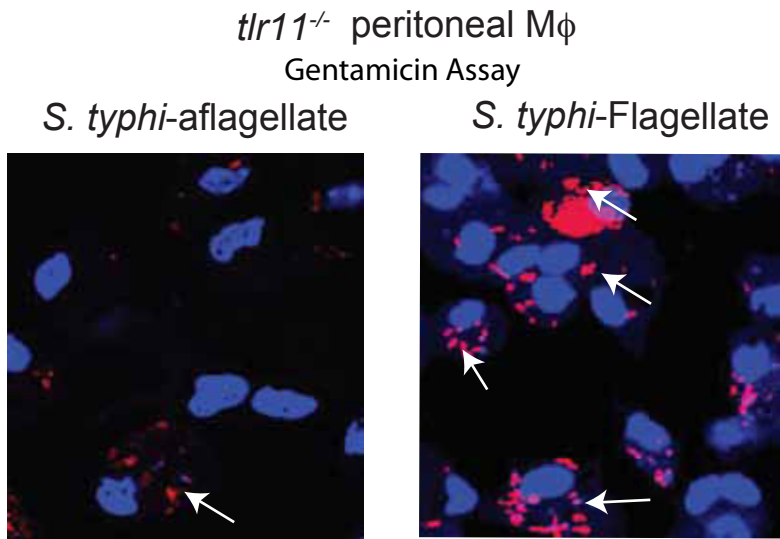

**B.**

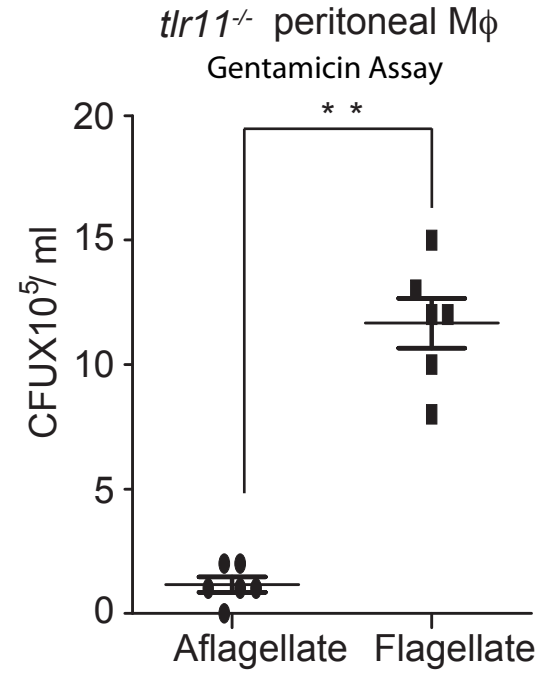

**C.**

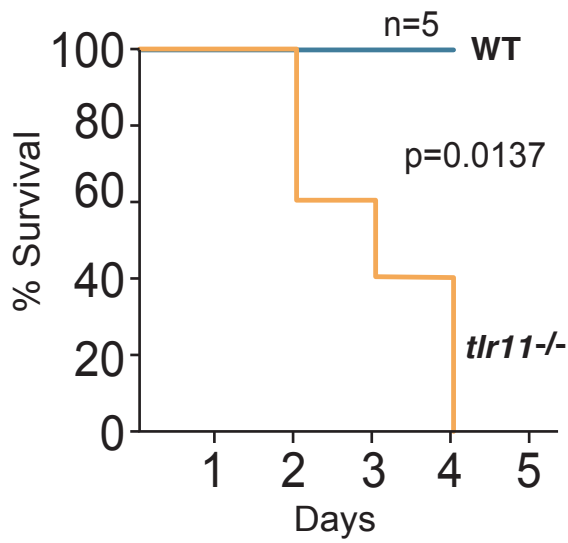

**D.**

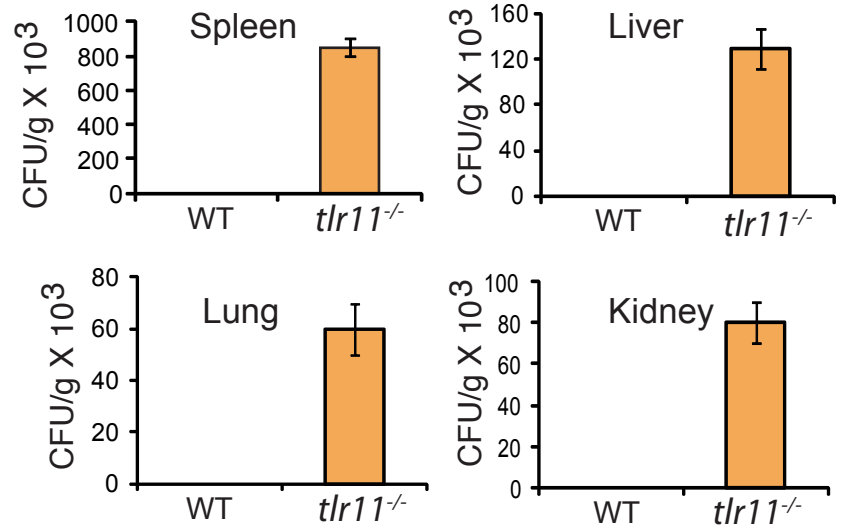

*S. typhi* (Intraperitoneal Infection  $10^4$  CFU)
